# Supplementary material for: A fluorescent signal-on sensor based on photoinduced electron transfer between copper nanoparticles and G-quadruplex/hemin
Source: Royal Society of Chemistry journal article supplement (doi:10.1039/c9ay00461k), 2019-01-01
Supplement: c9ay00461k1.pdf [file c9ay00461k1.pdf]

## Supporting Information

### **Fluorescent signal-on sensor based on photoinduced electron transfer between copper nanoparticles and G-quadruplex/hemin**

LiJuan OU, \* SiWen Qin, Heng Bo, JianXin Luo, NiCui Yuan, AiMing Sun, LingYun Wang and WeiHong Liu

*a College of Material and Chemical Engineering, Hunan Institute of Technology, Hengyang 421002, P. R. China.*

*b Key Laboratory of green functional building materials, Hunan Institute of Technology, Hengyang 421002, P. R. China.*

*\* Authors to whom correspondence should be addressed; E-mail: oulijuanann@163.com.*

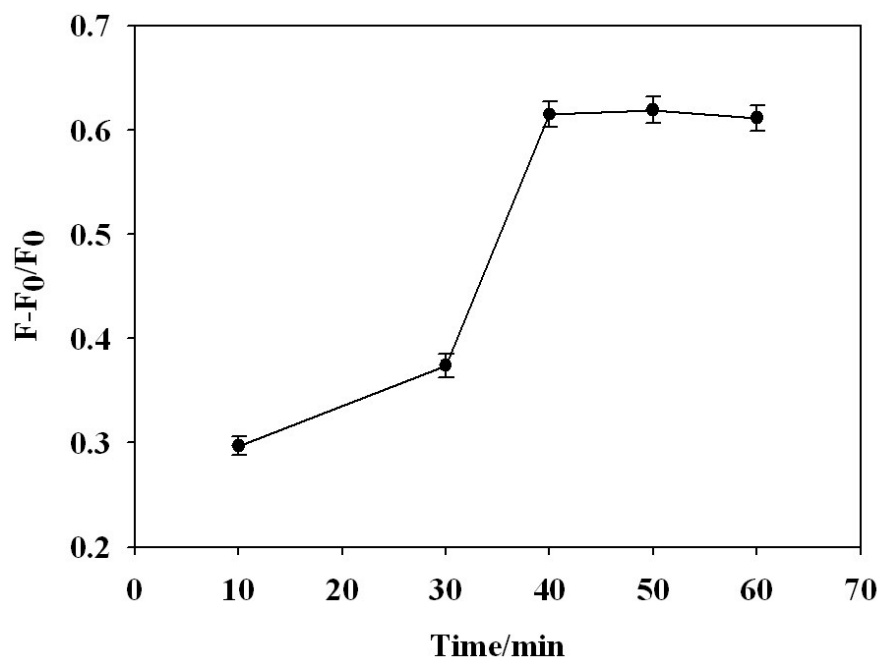

**Fig. S1** Effects of incubation time on the fluorescence response of the sensor for DNA detection.

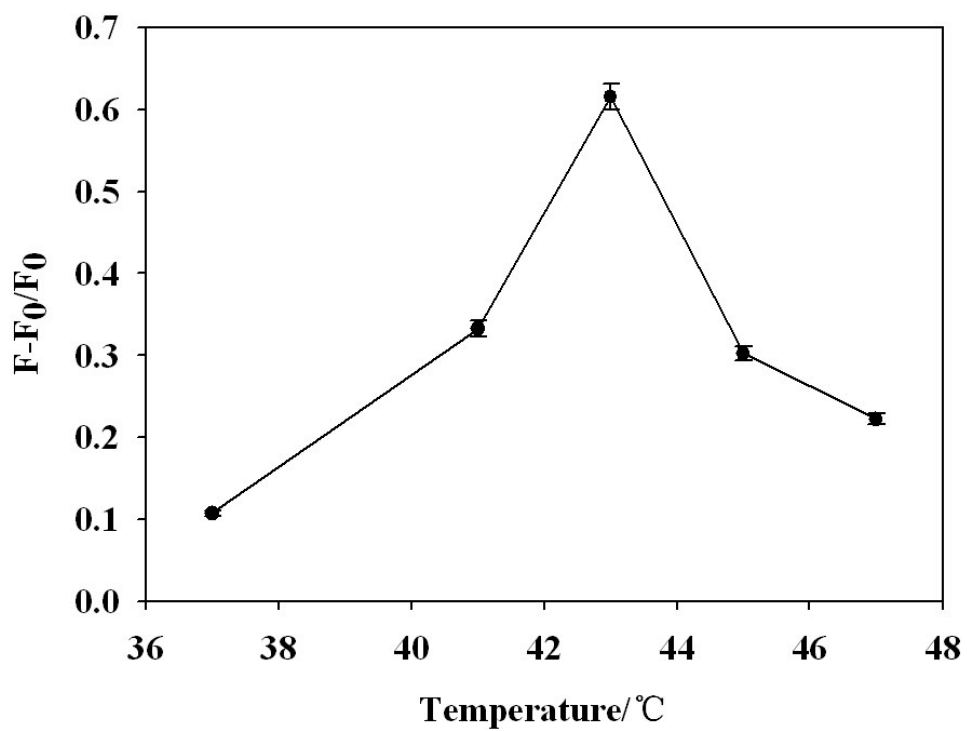

Fig. S2 Effects of incubation temperature on the fluorescence response of the sensor for DNA detection.

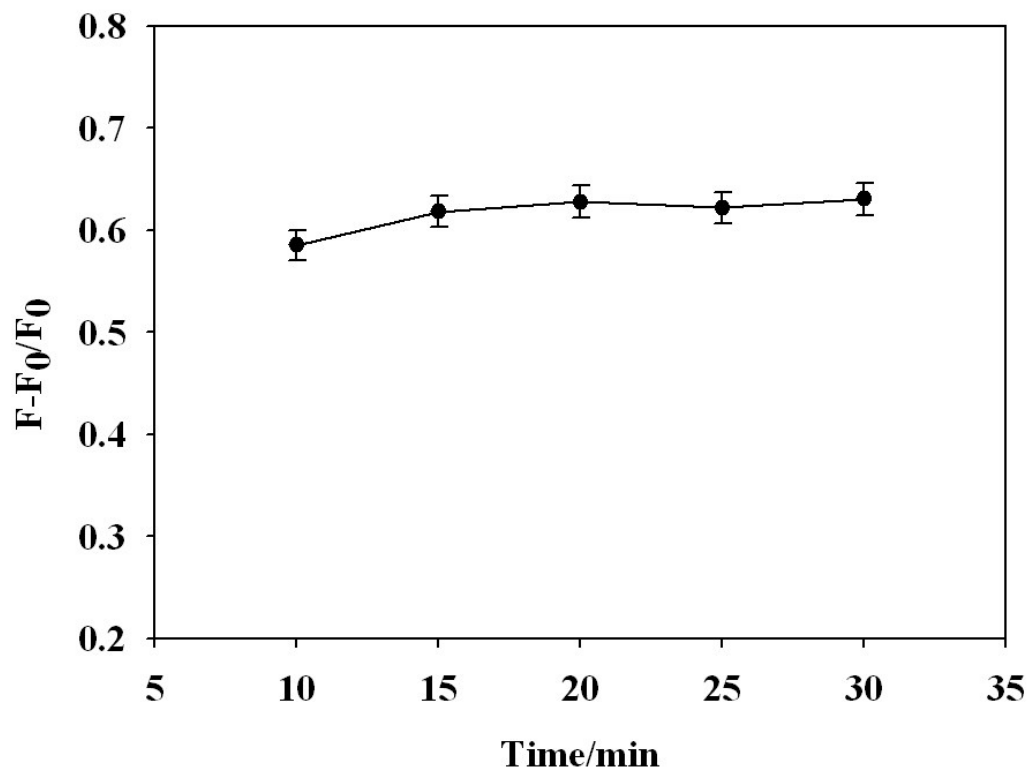

Fig. S3 Effects of time of CuNCs synthesis on the fluorescence response of the sensor for DNA detection.
